# Supplementary material for: One-electron redox kinetics of aqueous transition metal couples Zn2+/+, Co2+/+, and Ni2+/+using pulse radiolysis
Source: Royal Society of Chemistry journal article supplement (doi:10.1039/d0cp03214j), 2020-01-01
Supplement: d0cp03214j1.pdf [file d0cp03214j1.pdf]

**Supporting Information for publication:**

**One-electron redox kinetics of aqueous transition metal couples  
 $Zn^{2+/+}$ ,  $Co^{2+/+}$ , and  $Ni^{2+/+}$  using pulse radiolysis**

*Alexandra Lisovskaya, Kotchaphan Kanjana and David M. Bartels\**

Radiation Laboratory, University of Notre Dame, Notre Dame, Indiana 46556

\*Corresponding Author: [David.M.Bartels.5@nd.edu](mailto:David.M.Bartels.5@nd.edu); phone (574) 631-5561; fax: (574) 631-8068.

**Contents:**

Decays of  $Zn^+$ ,  $Co^+$  and  $Ni^+$  in TBA (Figures S1 (A), S2(A,B) and S5(A,B)).

$Cr(bpy)_3^{2+}$  absorption at 560 nm in TBA with  $Zn^{2+}$ ,  $Co^{2+}$  and  $Ni^{2+}$  (Figures S1(B), S2(C) and S5(C)).

$NMD^+$  signals at 460 nm with  $Co^{2+}$  and  $Ni^{2+}$  in formate (Figure S3).

$Ru(bpy)_3^+$  decays at 510 nm with various concentrations of  $Co^{2+}$  and formate (Figure S4(A,B)).

$MV^{\bullet+}$  absorption at 600 nm with  $Ni^{2+}$  in formate (Figure S5(D)).

Transient absorption and kinetics traces upon radiolysis of fluorescein solutions with  $Ni^{2+}$  in TBA at pH 6.5 (Figure S6).

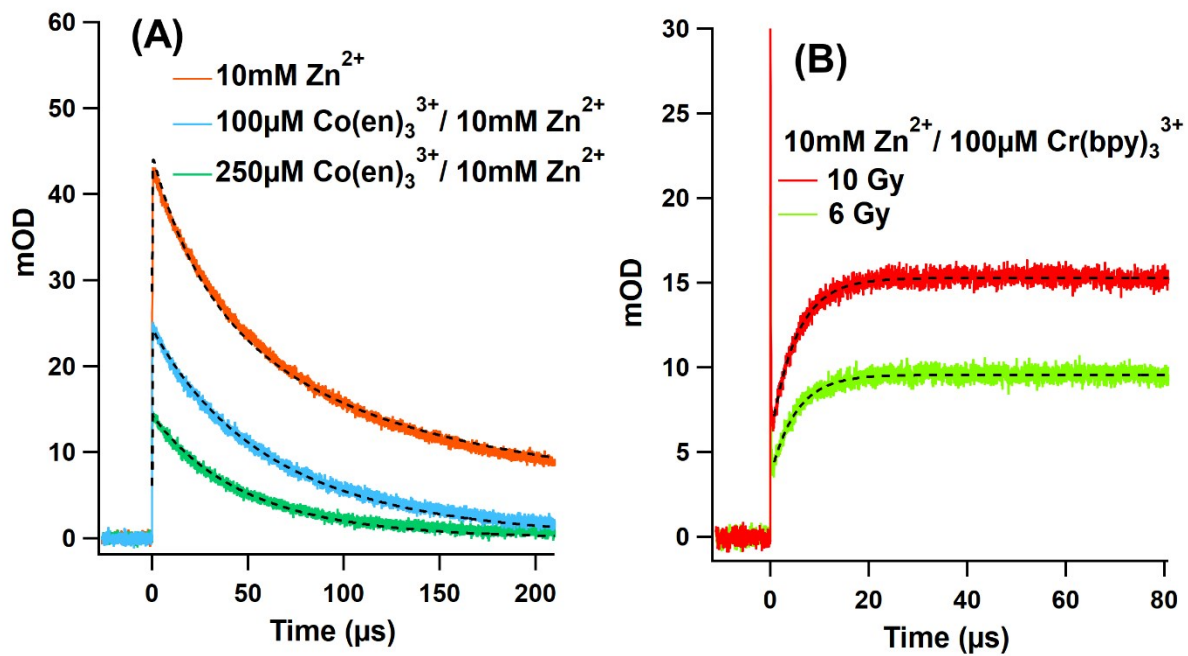

**Figure S1.** (A) Zn<sup>2+</sup> decay at 300nm in 0.1 M TBA with Co(en)<sub>3</sub><sup>3+</sup>; (B) 100  $\mu\text{M}$  Cr(bpy)<sub>3</sub><sup>2+</sup> absorption at 560 nm in 0.1 M TBA with 10mM Zn<sup>2+</sup>.

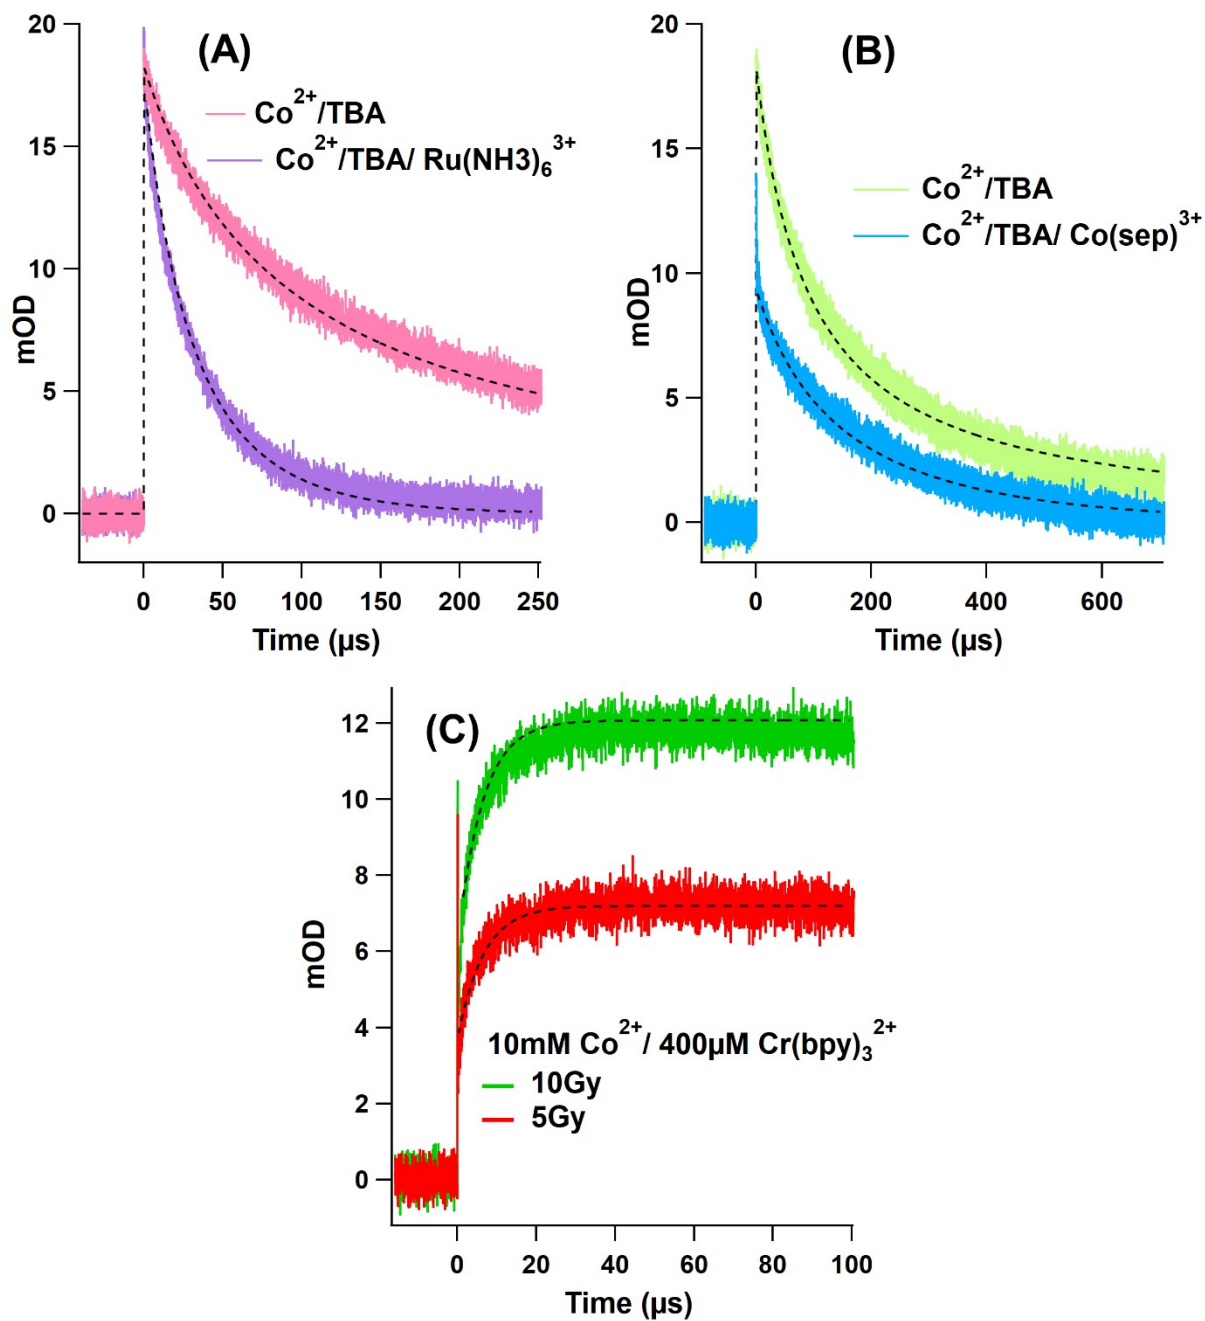

**Figure S2.**  $\text{Co}^+$  decay at 370nm in 0.1 M TBA with 200  $\mu\text{M}$   $\text{Ru}(\text{NH}_3)_6^{3+}$  (A) and 500  $\mu\text{M}$   $\text{Co}(\text{sep})^{3+}$ (B); (C) 400  $\mu\text{M}$   $\text{Cr}(\text{bpy})_3^{2+}$  absorption at 560 nm in 0.1 M TBA with 10 mM  $\text{Co}^{2+}$ . The fit curves are shown in black.

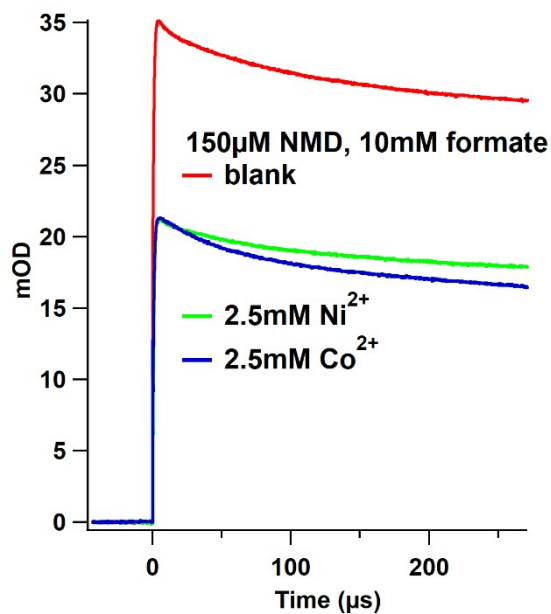

**Figure S3.** NMD<sup>+</sup> signals at 460 nm in 150 μM NMD<sup>2+</sup>, 10mM formate solutions with 2.5 mM Co<sup>2+</sup> and Ni<sup>2+</sup>.

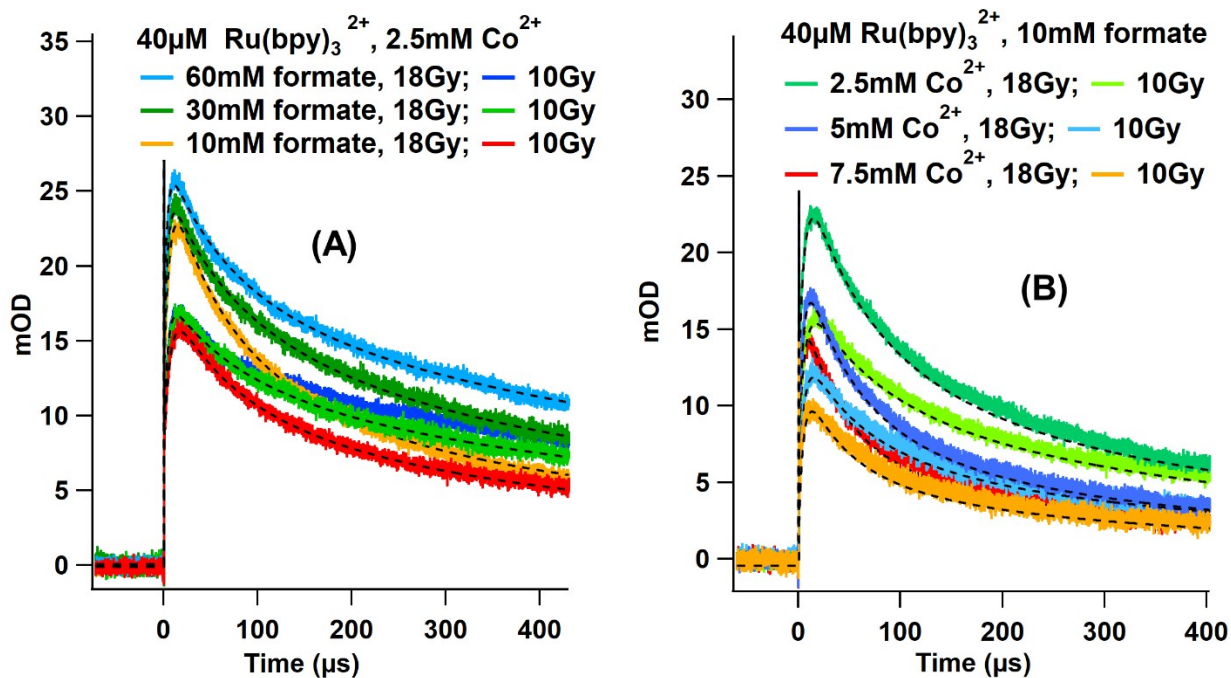

**Figure S4.** (A) Ru(bpy)<sub>3</sub><sup>+</sup> decays at 510 nm in 10 mM formate solutions of 40 μM Ru(bpy)<sub>3</sub><sup>2+</sup> with various concentrations of Co<sup>2+</sup> (2.5, 5 and 7.5 mM). (B) Ru(bpy)<sub>3</sub><sup>+</sup> decays at 510 nm in the solutions of 40 μM Ru(bpy)<sub>3</sub><sup>2+</sup> with 2.5 mM Co<sup>2+</sup> with various concentrations of formate (10, 30 and 60 mM). The fit curves are shown in black.

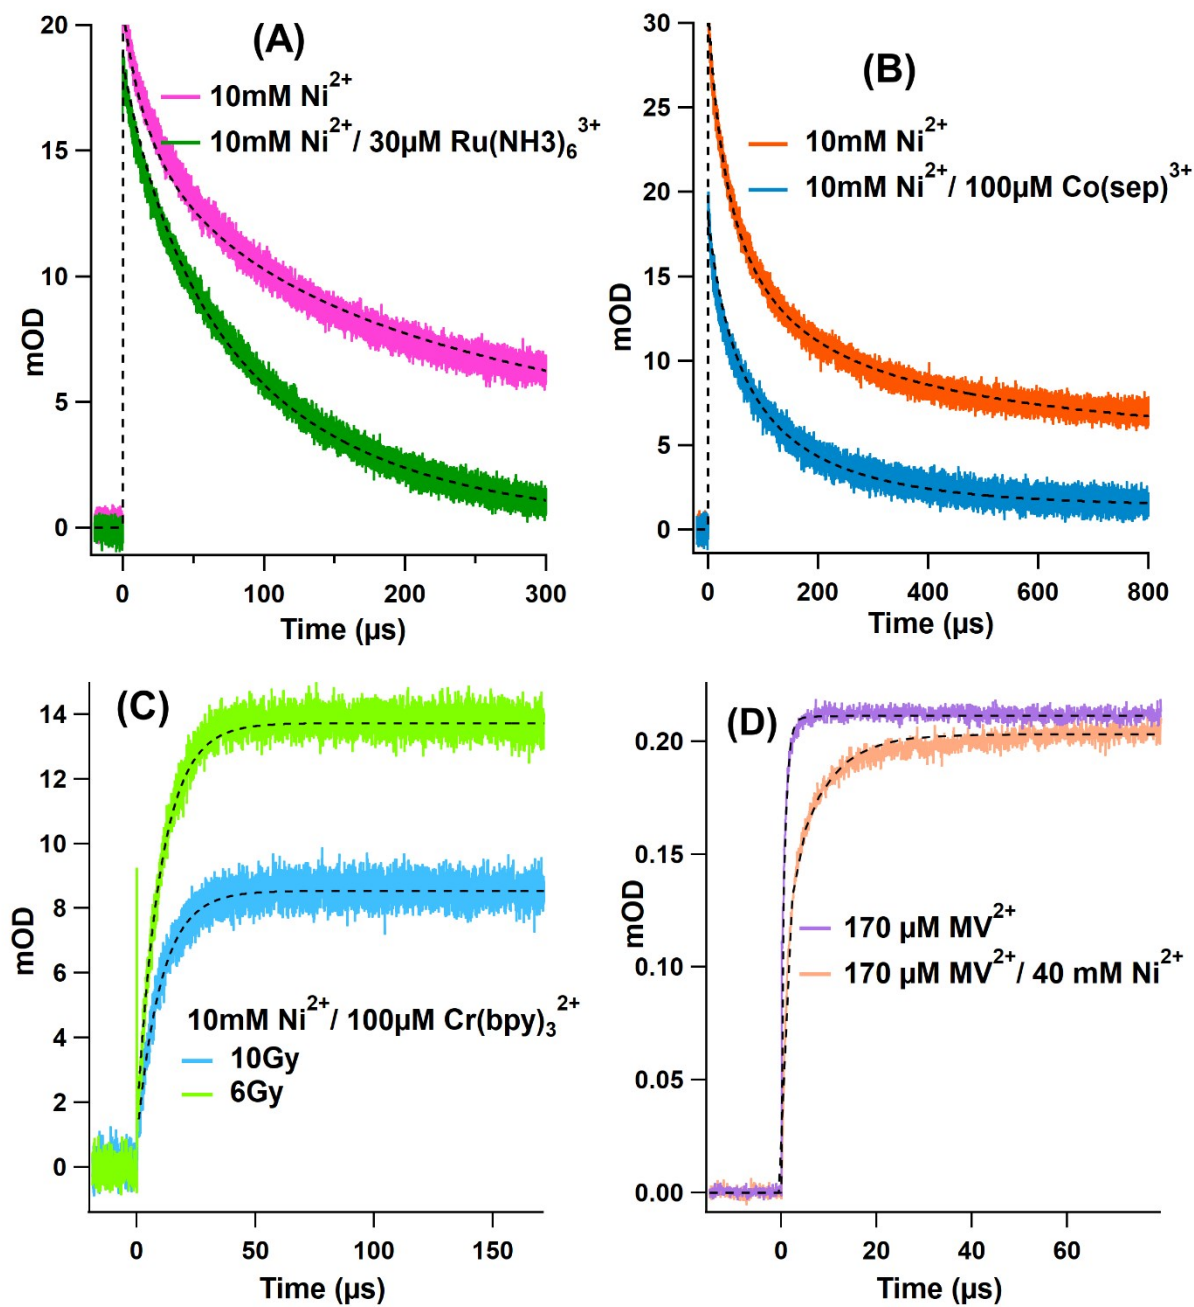

**Figure S5.** Ni<sup>2+</sup> decay at 300nm in 0.1 M TBA with 30μM Ru(NH<sub>3</sub>)<sub>6</sub><sup>3+</sup> (A) and 1mM Co(sep)<sup>3+</sup>(B); (C) 100 μM Cr(bpy)<sub>3</sub><sup>2+</sup> absorption at 560 nm in 0.1 M TBA with 10 mM Ni<sup>2+</sup>; (D) MV<sup>•+</sup> absorption at 600 nm in 40mM Ni<sup>2+</sup> solutions with 10mM formate. The fit curves are shown in black.

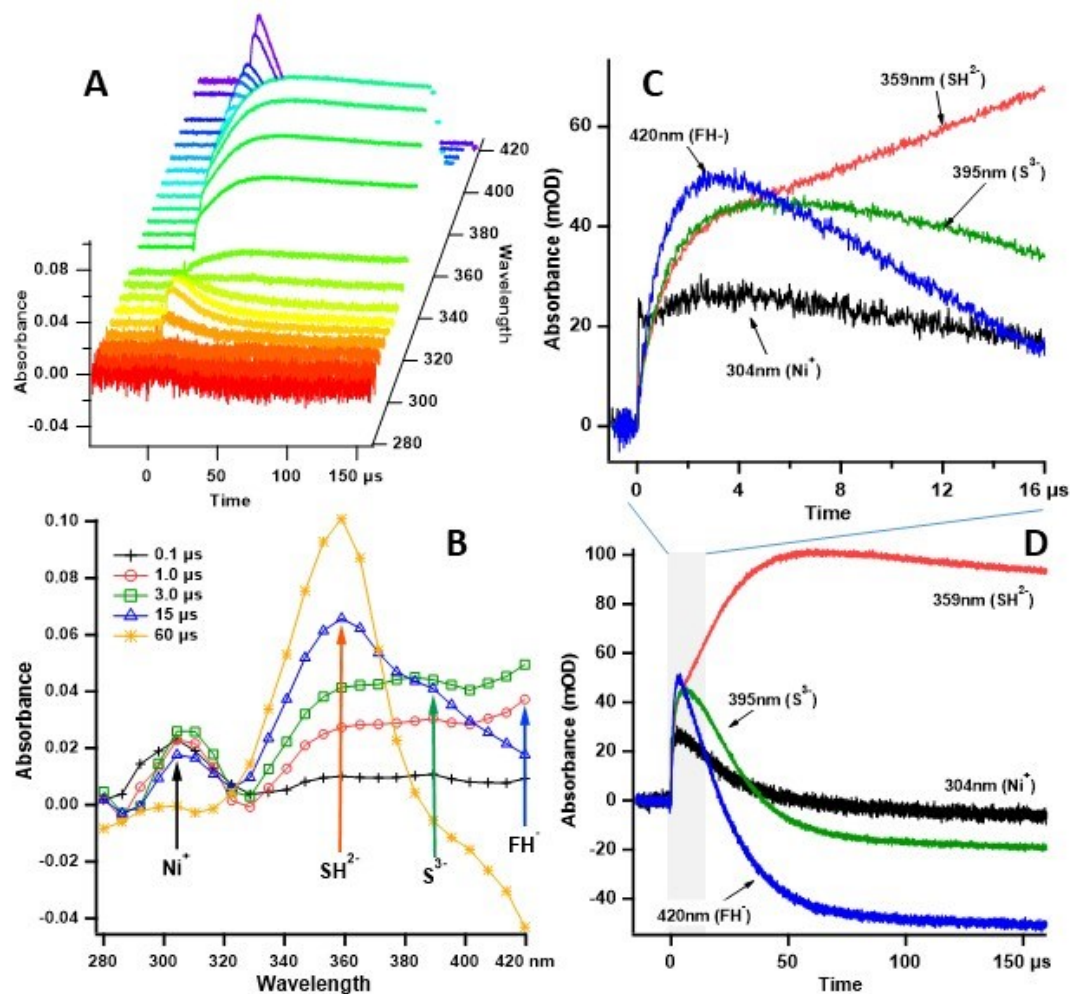

**Figure S6.** (A) Transient absorption upon 20Gy radiolysis in 100  $\mu\text{M}$  fluorescein solutions with 10mM  $\text{Ni}^{2+}$  and 100mM TBA at pH 6.5. (B) Spectra extracted from (A) at several points in the kinetic development. The four major transients are indicated. (C) Kinetics traces showing signal growth at four wavelengths corresponding to the four major transients. (D) Development of the signals in (C) out to 150 $\mu\text{s}$ .
